# Supplementary material for: Iridium complexes embedded into and end-capped onto phosphorescent polymers: optimizing PLED performance and structure–property relationships
Source: Royal Society of Chemistry journal article supplement (doi:10.1039/b800929e), 2008-01-01
Supplement: b800929e.pdf [file b800929e.pdf]

Supplementary Material (ESI) for Journal of Materials Chemistry  
This journal is (c) The Royal Society of Chemistry 2008

## **Iridium Complexes Embedded and End-Capped Phosphorescent Polymers: Optimizing PLEDs Performance and Structure-Property Relationship**

**Kai Zhang<sup>a</sup>, Zhao Chen<sup>b</sup>, Chuluo Yang<sup>\*a</sup>, Yang Zou<sup>a</sup>, Shaolong Gong<sup>a</sup>, Youtian Tao<sup>a</sup>,  
Jingui Qin<sup>a</sup>, Yong Cao<sup>b</sup>**

<sup>a</sup> Department of Chemistry, Hubei Key Lab on Organic and Polymeric Optoelectronic  
Materials, Wuhan University, Wuhan 430072, P. R. China

<sup>b</sup> Institute of Polymer Optoelectronic Materials and Devices, South China University  
of Technology, Guangzhou 510640, P. R. China

<sup>c</sup> Shanghai Institute of Organic Chemistry, Chinese Academy of Sciences, Shanghai  
200032, People's Republic of China

Fax: +86-27-68756757; Email: clyang@whu.edu.cn

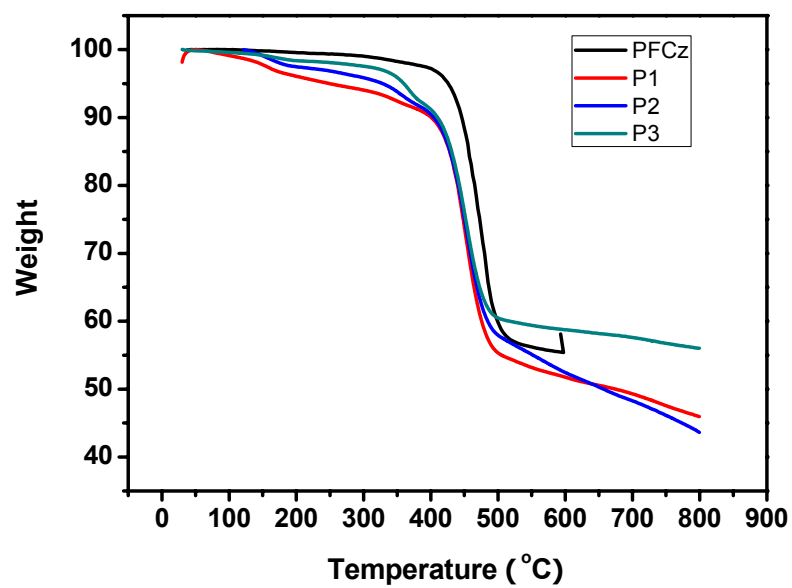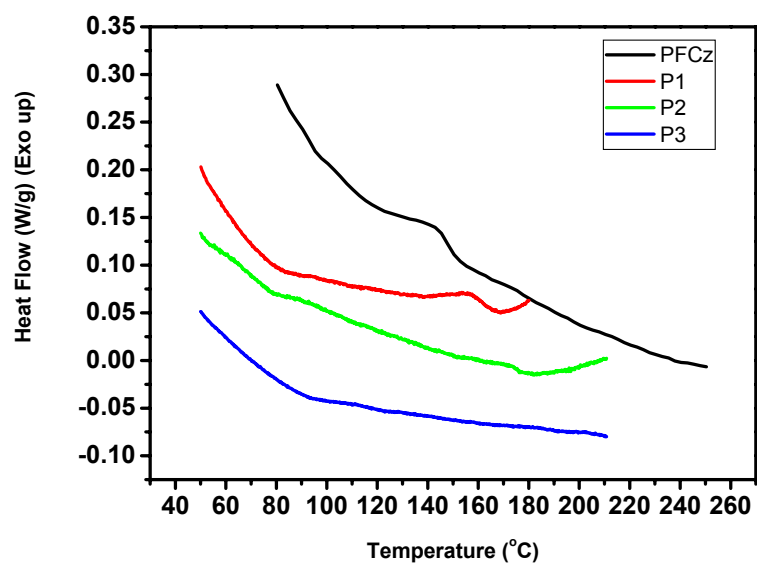

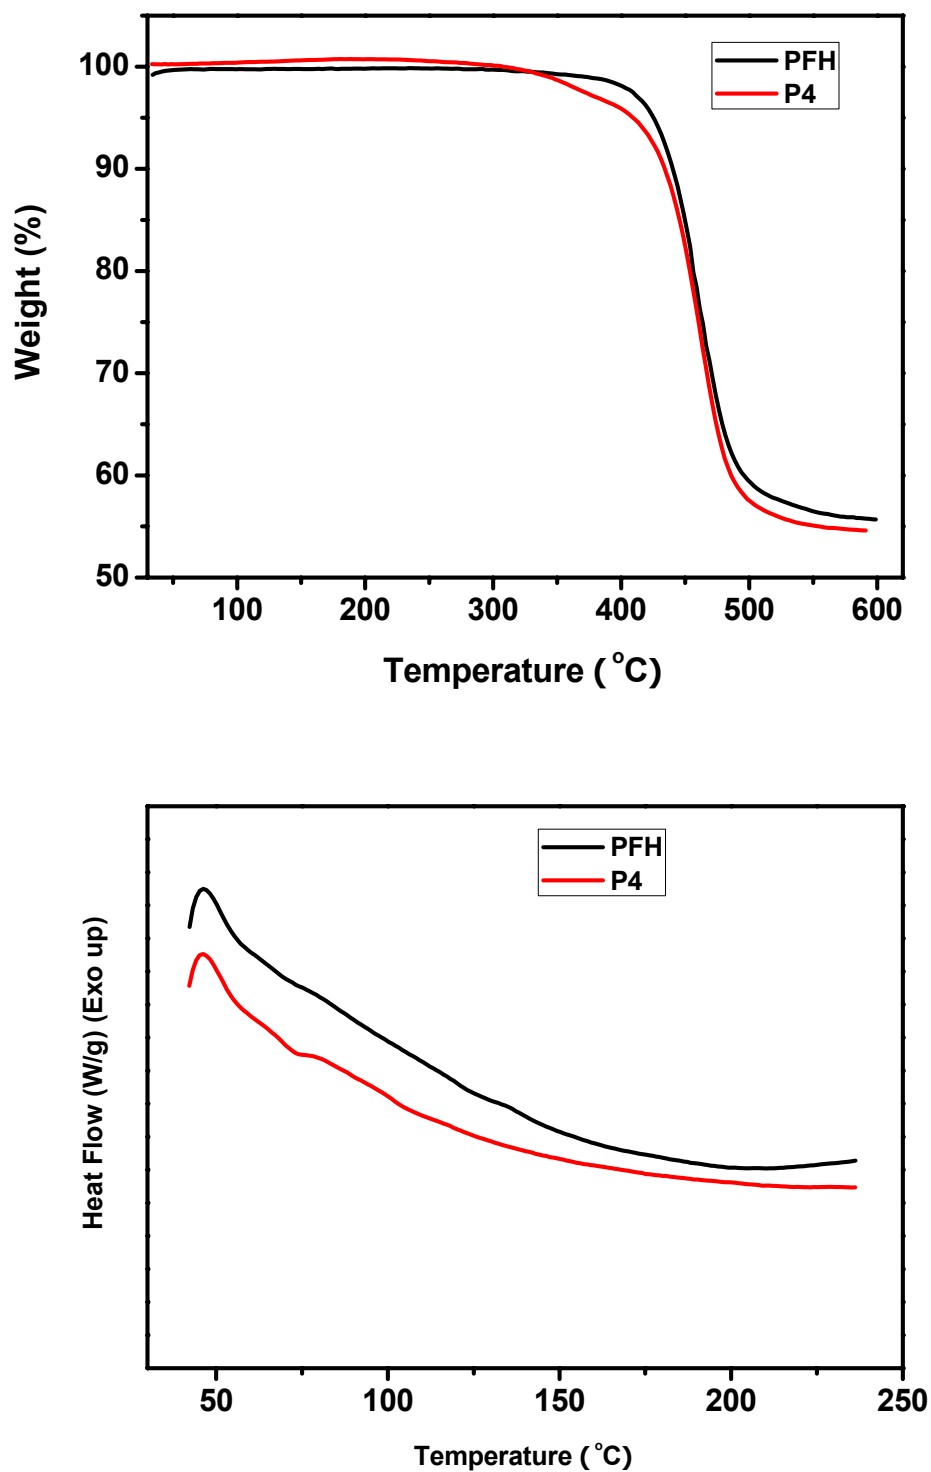

**Figure S1.** DSC (up) and TGA (down) thermograms of PFCz, PFH and copolymers P1-P4.

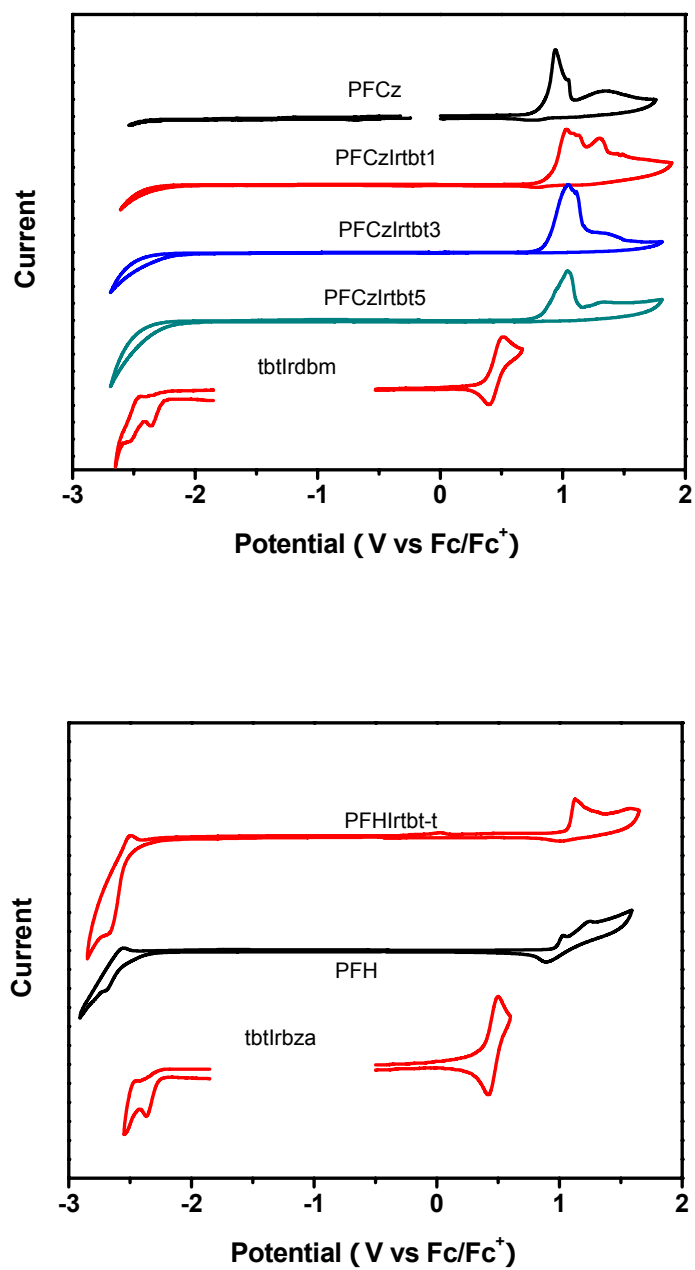

**Figure S2.** Cyclic voltammograms of PFCz, PFH, P1-4 and corresponding iridium complexes.

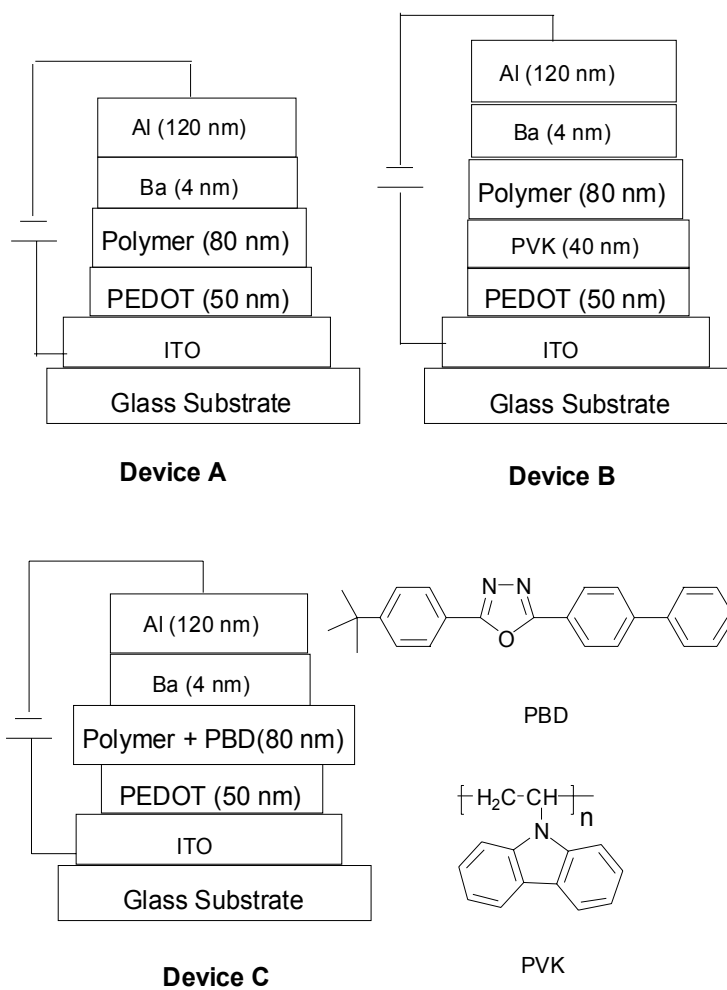

**Figure S3.** The configurations of the Device A, B and C, along with the molecular structures of materials.
